# Supplementary material
Source: HighWire-hosted journal article supplement (https://bmjopenquality.bmj.com/highwire/filestream/135961/field_highwire_adjunct_files/1/ds4378.xls)
Supplement: ds4378.xls [file ds4378.xls]

## Sheet: Post Intervention Raw Data
id	RIOnumber	age	gender	admissiondate	admissiontime	clerkedby	piphas	difference1	difference2	q1	q2	q2other	q3	q4	q4other	q5	q6	q7	q8	q9	q10	q11	q12	q13	q14	q15	q16	q17	q18	q19	q19other
1	*	74	Female	29/03/14	20:06	On Call	No	N/A		Yes	N/A		N/A	N/A		N/A	No	No	N/A	No	No	No	No	No	No	No	No	Yes	After one week	N/A
2	*	50	Male	29/03/14	08:29	On Call	No	N/A		No	Other	"Done in A&E"	Yes	N/A		N/A	N/A	No	N/A	No	No	No	Yes	Yes	Yes	No	No	Yes	24hours	N/A
3	*	62	Female	30/03/14	11:05	On Call	No	N/A		Yes	N/A		N/A	N/A		N/A	N/A	No	N/A	No	No	No	Yes	Yes	Yes	Partial	Partial	No	Not taken	No Documented Reason
4	*	62	Female	09/04/14	23:38	On Call	No	No		No	Patient Refused		Yes	N/A		No	N/A	No	N/A	No	No	No	Yes	Yes	Yes	No	No	Yes	48hours	N/A
5	*	22	Male	30/03/14	11:53	On Call	Yes	No		Yes	N/A		N/A	N/A		N/A	N/A	No	N/A	No	Yes	No	Yes	Yes	Yes	No	No	No	Not taken	No Documented Reason
6	*	74	Female	30/03/14	07:37	On Call	No	N/A		No	No Documented Reason		No	No Documented Reason		No	No	N/A	N/A	No	No	No	No	No	No	No	No	No	Not taken	No Documented Reason
7	*	57	Female	30/03/14	15:29	On Call	No	N/A		Yes	N/A		N/A	N/A		N/A	N/A	No	N/A	No	No	No	Yes	Yes	Yes	Yes	Yes	No	Not taken	No Documented Reason
8	*	49	Female	30/03/14	17:21	On Call	No	N/A		No	Other	"Once more stable"	No	No Documented Reason		No	N/A	N/A	N/A	No	No	No	No	No	No	No	No	No	Not taken	No Documented Reason
9	*	28	Male	30/03/14	21:47	On Call	No	N/A		No		"Clinic room busy"	No	No Documented Reason		N/A	N/A	No	N/A	No	No	No	No	No	No	No	No	No	Not taken	No Documented Reason
10	*	31	Female	01/04/13	03:37	On Call	No	N/A		Yes	N/A		N/A	N/A		N/A	N/A	No	N/A	No	No	No	Yes	Yes	Yes	Yes	Yes	No	Not taken	No Documented Reason
11	*	30	Male	01/04/14	17:56	Day Team	No	N/A		Yes	N/A		N/A	N/A		N/A	N/A	No	N/A	Yes	Yes	Yes	Partial	Yes	Partial	Yes	Yes	No	Not taken	No Documented Reason
12	*	66	Male	01/04/14	22:52	On Call	No	N/A		Yes	N/A		N/A	N/A		N/A	N/A	No	N/A	No	No	No	Yes	Yes	Yes	Yes	Yes	Yes	After one week	N/A
13	*	43	Male	02/04/14	15:18	Day Team	No	N/A		No	Other	"When patient more settled"	No	No Documented Reason		N/A	N/A	No	N/A	No	No	No	No	No	No	No	No	No	Not taken	Recent in-hospital bloods
14	*	31	Female	02/04/14	18:47	Day Team	No	N/A		No	Other	Patient requested examination day after	No	No Documented Reason		No	N/A	N/A	N/A	No	No	No	No	No	No	No	No	Yes	One week	N/A
15	*	18	Female	03/04/14	00:50	On Call	Yes	No		Yes	N/A		N/A	N/A		N/A	N/A	No	N/A	Yes	Yes	Yes	Yes	Yes	Yes	Yes	Yes	No	Not taken	No Documented Reason
16	*	57	Male	03/04/14	02:34	On Call	No	N/A		Yes	N/A		N/A	N/A		N/A	N/A	No	N/A	No	Yes	Yes	Yes	Yes	Yes	Yes	Yes	No	Not taken	No Documented Reason
17	*	42	Female	03/04/14	17:42	Day Team	Yes	No		Yes	N/A		N/A	N/A		N/A	N/A	No	N/A	No	Yes	Yes	Yes	Yes	Yes	Yes	Yes	Yes	After one week	No Documented Reason
18	*	37	Male	03/04/14	21:06	On Call	Yes	No		Yes	N/A		N/A	N/A		N/A	N/A	No	N/A	No	Yes	Yes	Yes	Yes	Yes	Yes	Yes	No	Not taken	No Documented Reason
19	*	78	Male	03/04/14	23:50	On Call	No	N/A		No	Patient Refused		No	No Documented Reason		No	N/A	N/A	N/A	No	Yes	Yes	No	No	No	No	No	No	Not taken	Patient Refused
20	*	48	Female	04/04/14	03:38	On Call	No	N/A		No	Patient Refused		No	No Documented Reason		No	N/A	N/A	N/A	No	No	No	No	No	No	No	No	No	Not taken	No Documented Reason
21	*	26	Male	04/04/14	03:48	On Call	No	N/A		Yes	N/A		N/A	N/A		N/A	N/A	No	N/A	No	Yes	Yes	Yes	Yes	Yes	No	No	No	Not taken	No Documented Reason
22	*	25	Male	04/04/14	15:55	Day Team	No	N/A		Yes	N/A		N/A	N/A		N/A	N/A	No	N/A		Yes	Yes	Yes	Yes	Yes	Yes	Yes	No	Not taken	No Documented Reason
23	*	38	Female	04/04/14	18:54	On Call	Yes	N/A		Yes	N/A		N/A	N/A		N/A	N/A	Yes	Yes	Yes	Yes	Yes	Yes	Yes	Yes	Yes	Yes	No	Not taken	Recent in-hospital bloods
24	*	42	Male	04/04/14	20:43	On Call	No	N/A		Yes	N/A		N/A	N/A		N/A	N/A	No	N/A	No	No	No	Yes	Yes	Yes	Yes	Yes	Yes	48hours	N/A
25	*	33	Female	05/04/14	14:42	On Call	No	N/A		Yes	N/A		N/A	N/A		N/A	N/A	Yes	Yes	No	Yes	Yes	Yes	Yes	Yes	Yes	Yes	No	Not taken	No Documented Reason
26	*	81	Male	05/04/14	23:56	On Call	No	N/A		No	Patient Refused		Yes	N/A		No	N/A	No	N/A	No	No	No	Yes	Yes	Yes	Partial	Partial	Yes	After one week	N/A
27	*	54	Female	05/04/14	22:31	On Call	No	N/A		Yes	N/A		N/A	N/A		N/A	N/A	No	N/A	No	Yes	Yes	Yes	Yes	Yes	Yes	Yes	Yes	After one week	N/A
28	*	48	Female	06/04/14	13:56	On Call	No	N/A		Yes	N/A		N/A	N/A		N/A	N/A	No	N/A	No	Yes	No	Yes	Yes	Yes	Yes	Yes	Yes	24hours	N/A
29	*	31	Male	06/04/14	03:34	On Call	No	N/A		No	No Documented Reason		N/A	No Documented Reason		N/A	N/A	No	N/A	No	No	No	No	No	No	No	No	No	Not taken	No Documented Reason
30	*	66	Female	07/04/14	01:05	On Call	No	N/A		No	Patient Refused		No	No Documented Reason		No	No	N/A	N/A	No	Yes	Partial	No	No	No	No	No	Yes	24hours	N/A
31	*	48	Male	07/04/14	04:10	On Call	No	N/A		No	No Documented Reason		N/A	No Documented Reason		N/A	N/A	N/A	N/A	No	No	No	No	No	No	No	No	No	Not taken	No Documented Reason
32	*	69	Female	07/04/14	19:17	On Call	Yes	No		Yes	N/A		N/A	N/A		N/A	No	No	N/A	Yes	Yes	Yes	Yes	Yes	Yes	No	No	Yes	48hours	N/A
33	*	49	Male	07/04/14	23:26	On Call	No	N/A		No	Patient Refused		Yes	N/A		No	N/A	No	N/A	No	Yes	No	Yes	Yes	Yes	Yes	Yes	Yes	24hours	N/A
34	*	35	Female	08/04/14	22:57	On Call	No	N/A		No	Patient Refused		Yes	N/A		No	N/A	No	N/A	Partial	Yes	Yes	Yes	Yes	Yes	No	No	Yes	48hours	N/A
35	*	28	Male	09/04/14	01:01	On Call	No	N/A		No	Patient Refused		No	No Documented Reason		No	N/A	N/A	N/A	No	No	Yes	No	No	No	No	No	No	Not taken	No Documented Reason
36	*	22	Female	09/04/14	05:40	On Call	No	N/A		No	Patient Refused		No	No Documented Reason		No	N/A	N/A	N/A	No	Yes	Yes	No	No	No	No	No	No	Not taken	Other	Patient not available
37	*	47	Female	09/04/14	06:29	On Call	No	N/A		No	No Documented Reason		Yes	N/A		Yes	N/A	No	N/A	No	No	No	Yes	Yes	Yes	Partial	No	No	Not taken	Patient Refused
38	*	51	Male	09/04/14	11:53	Day Team	No	N/A		Yes	N/A		N/A	N/A		N/A	N/A	No	N/A	Yes	Yes	No	Yes	Yes	Yes	No	Yes	Yes	24hours	N/A
39	*	34	Female	09/04/14	17:40	Day Team	No	N/A		Yes	N/A		N/A	N/A		N/A	N/A	No	No	No	Yes	Yes	Yes	Yes	Yes	No	Yes	No	Not taken	No Documented Reason
40	*	67	Male	10/04/14	22:45	On Call	No	N/A		Yes	N/A		N/A	N/A		N/A	No	No	No	No	Yes	Yes	Yes	Yes	Yes	Yes	Yes	Yes	24hours	N/A
41	*	54	Male	11/04/14	16:47	Day Team	Yes	Yes	peri-umbilical hernia - no action needed/taken.	Yes	N/A		N/A	N/A		N/A	N/A	Yes	Yes	Yes	Yes	No	Yes	Yes	Yes	Partial	Partial	Yes	One week	N/A
42	*	19	Female	12/04/14	03:33	On Call	Yes	No		Yes	N/A		N/A	N/A		N/A	N/A	No	N/A	Yes	Yes	Yes	Yes	Yes	Yes	Yes	Yes	Yes	72hours	N/A
43	*	47	Male	09/04/14	20:41	On Call	No	N/A		No	No Documented Reason		No	No Documented Reason		No	N/A	N/A	N/A	No	No	No	No	No	No	No	No	No	Not taken	No Documented Reason
44	*	21	Female	09/04/14	01:34	On Call	No	N/A		Yes	N/A		N/A	N/A		N/A	N/A	No	N/A	No	Yes	Yes	Partial	Partial	Partial	Partial	No	No	Not taken	No Documented Reason
45	*	87	Female	10/04/14	21:34	On Call	Yes	Yes	Persistent right knee pain on background of DVTs	Yes	N/A		N/A	N/A		N/A	No	No	No	No	Yes	No	Yes	Yes	Yes	Yes	Yes	Yes	One week	N/A
46	*	42	Male	11/04/14	22:41	On Call	Yes	No		Yes	N/A		N/A	N/A		N/A	N/A	Yes	Yes	Yes	Yes	Yes	Yes	Yes	Yes	Yes	Yes	Yes	One week	N/A
47	*	95	Female	11/04/14	20:21	On Call	No	N/A		Yes	N/A		N/A	N/A		N/A	No	No	No	Yes	Yes	No	Yes	Yes	Yes	Partial	Partial	No	Not taken	Recent in-hospital bloods
48	*	79	Female	12/04/14	01:56	On Call	Yes	Yes	Patient thin and had dry mucus membranes therefore repeat bloods requested	Yes	N/A		N/A	N/A		N/A	No	No	N/A	Yes	Yes	Yes	Yes	Yes	Yes	Yes	Yes	Yes	24hours	N/A
49	*	44	Male	12/04/14	14:27	On Call	No	N/A		Yes	N/A		N/A	N/A		N/A	N/A	No	No	No	Yes	Yes	Yes	Yes	Yes	No	No	Yes	24hours	N/A
50	*	40	Male	12/04/14	20:35	On Call	No	N/A		Yes	N/A		N/A	N/A		N/A	N/A	No	N/A	No	No	No	Yes	Yes	Yes	No	No	Yes	48hours	N/A
51	*	29	Male	13/04/14	01:35	On Call	No	N/A		Yes	N/A		N/A	N/A		N/A	N/A	No	N/A	No	No	Yes	No	No	No	No	No	Yes	One week	N/A
52	*	72	Male	13/04/14	08:22	On Call	Yes	Yes	Scattered wheeze and AF also excluded HI following fall	Yes	N/A		N/A	N/A		N/A	N/A	No	N/A	Yes	Yes	Yes	Yes	Yes	Yes	Yes	Yes	Yes	48hours	N/A
53	*	43	Male	13/04/14	10:56	On Call	No	N/A		Yes	N/A		N/A	N/A		N/A	N/A	No	N/A	No	Yes	Yes	Yes	Yes	Yes	No	No	No	Not taken	No Documented Reason
54	*	33	Female	14/04/14	02:39	On Call	Yes	Yes	Documented evidence of self harm informing risk assessment	Yes	N/A		N/A	N/A		N/A	N/A	Yes	Yes	Yes	Yes	Yes	Yes	Yes	Yes	Yes	Yes	Yes	72hours	N/A
55	*	32	Female	14/04/14	22:45	On Call	No	N/A		No	Other	Acutely psychotic state	Yes	N/A		No	N/A	No	N/A	No	No	No	Yes	Yes	Yes	Partial	Partial	No	Not taken	No Documented Reason
56	*	49	Male	14/04/14	22:06	On Call	No	N/A		Yes	N/A		N/A	N/A		N/A	N/A	No	N/A	No	No	Yes	Yes	Yes	Yes	Partial	Partial	Yes	72hours	N/A
57	*	28	Female	15/04/14	00:12	On Call	No	N/A		Yes	N/A		N/A	N/A		N/A	N/A	No	N/A	No	Yes	Yes	Yes	Yes	Yes	No	No	Yes	72hours	N/A
58	*	48	Female	15/04/14	06:07	On Call	No	N/A		Yes	N/A		N/A	N/A		N/A	N/A	No	N/A	No	No	No	Yes	Yes	Yes	Partial	Partial	Yes	24hours	N/A
59	*	63	Male	16/04/14	21:45	On Call	No	N/A		Yes	N/A		N/A	N/A		N/A	N/A	No	N/A	No	No	No	Yes	Yes	Yes	Partial	No	Yes	24hours	N/A
60	*	29	Female	22/04/14	17:10	Day Team	No	N/A		Yes	N/A		N/A	N/A		N/A	N/A	No	No	Yes	No	No	Yes	Yes	Yes	Partial	Partial	No	Not taken	No Documented Reason
61	*	25	Male	15/04/2014	19:32	On Call	Yes	No		Yes	N/A		N/A	N/A		N/A	N/A	No	N/A	Yes	Yes	No	Yes	Yes	Yes	Yes	Yes	No	Not taken	Patient Refused
62	*	19	Female	15/04/2014	23:28	On Call	No	N/A		Yes	N/A		N/A	N/A		N/A	N/A	No	N/A	No	No	No	Yes	Yes	Yes	Partial	Partial	Yes	After one week	N/A
63	*	27	Male	16/04/14	23:34	On Call	No	N/A		Yes	N/A		N/A	N/A		N/A	N/A	No	N/A	No	No	No	Yes	Yes	Yes	Partial	Partial	No	Not taken	No Documented Reason
64	*	27	Male	13/05/14	23:00	On Call	Yes	Yes	Documented evidence of self-harm.	Yes	N/A		N/A	N/A		N/A	N/A	No	N/A	Yes	Yes	No	Yes	Yes	Yes	Yes	Yes	No	Not taken	No Documented Reason
65	*	27	Male	31/05/14	07:05	On Call	Yes	Yes	self harm documented. Evidence of fungal infection found,	Yes	N/A		N/A	N/A		N/A	N/A	Yes	Yes	Yes	Yes	No	Yes	Yes	Yes	Partial	Partial	No	Not taken	No Documented Reason
66	*	33	Male	16/04/14	16:57	Day Team	No	N/A		No	Other	Admission plan for it to be done tomorrow, Althought it never happened.	No	No Documented Reason		N/A	N/A	N/A	N/A	No	No	No	No	No	No	No	No	Yes	One week	N/A
67	*	67	Male	16/04/14	22:39	On Call	No	N/A		Yes	N/A		N/A	N/A		N/A	N/A	No	N/A	No	No	No	Yes	Yes	Yes	Yes	No	Yes	After one week	N/A
68	*	22	Female	17/04/14	01:09	On Call	No	N/A		Yes	N/A		N/A	N/A		N/A	N/A	No	N/A	No	No	No	Partial	Yes	Yes	Partial	Partial	No	Not taken	Recent in-hospital bloods
69	*	18	Female	16/04/14	01:41	On Call	Yes	No		Yes	N/A		N/A	N/A		N/A	N/A	No	N/A	No	Yes	Yes	Yes	Yes	Yes	No	No	No	Not taken	Other	patient discharged less than 24 hours after admission
70	*	86	Female	17/04/14	22:50	On Call	No	N/A		Yes	N/A		N/A	N/A		N/A	No	No	N/A	No	No	No	Yes	Yes	Yes	Partial	Partial	Yes	One week	N/A
71	*	26	Male	18/04/14	00:55	On Call	Yes	No		Yes	N/A		N/A	N/A		N/A	N/A	No	N/A	No	Yes	Yes	Yes	Yes	Yes	No	No	No	Not taken	Recent in-hospital bloods
72	*	55	Male	18/04/14	23:07	On Call	No	N/A		Yes	N/A		N/A	N/A		N/A	N/A	Yes	Yes	No	Yes	No	Yes	Yes		No	No	Yes	After one week	N/A
73	*	19	Female	18/04/14	21:11	On Call	Yes	Yes	Tender abdomen and vomiting - anti-emetics prescribed and plan made to send to A&E if worse	Yes	N/A		N/A	N/A		N/A	N/A	No	N/A	No	Yes	Yes	Yes	Yes	Yes	Yes	Yes	No	Not taken	Recent in-hospital bloods
74	*	45	Male	19/04/14	19:35	On Call	No	N/A		Yes	N/A		N/A	N/A		N/A	N/A	No	No	No	No	No	No	No	No	No	Partial	No	Not taken	No Documented Reason
75	*	34	Male	20/04/14	04:46	On Call	Yes	No		Yes	N/A		N/A	N/A		N/A	N/A	Yes	Yes	Yes	No	Yes	Yes	Yes	Yes	Yes	Yes	No	Not taken	No Documented Reason
76	*	60	Male	21/04/14	12:09	Day Team	No	N/A		Yes	N/A		N/A	N/A		N/A	N/A	No	N/A	No	No	No	Yes	Yes	No	No	No	Yes	24hours	N/A
77	*	26	Female	21/04/14	02:13	On Call	Yes	No		Yes	N/A		N/A	N/A		N/A	N/A	Yes	Yes	Yes	Yes	Yes	Yes	Yes	Yes	No	No	No	Not taken	Recent in-hospital bloods
78	*	19	Female	22/04/2014	14:08	Day Team	No	N/A		Yes	N/A		N/A	N/A		N/A	N/A	No	N/A	No	No	No	Yes	Yes	Yes	Partial	Partial	No	Not taken	Recent in-hospital bloods
79	*	31	Female	23/04/14	04:47	On Call	No	N/A		Yes	N/A		N/A	N/A		N/A	N/A	No	N/A	No	Yes	No	Yes	Yes	Yes	Yes	Yes	No	Not taken	No Documented Reason
80	*	30	Male	23/04/14	04:03	On Call	No	N/A		Yes	N/A		N/A	N/A		N/A	N/A	No	N/A	No	No	No	Yes	Yes	Yes	Yes	Yes	No	Not taken	No Documented Reason
81	*	35	Female	23/04/14	07:16	On Call	Yes	Yes	right basal creps. No action taken.	Yes	N/A		N/A	N/A		N/A	N/A	No	N/A	No	No	Yes	Yes	Yes	Yes	Yes	Yes	Yes	24hours	N/A
82	*	35	Male	24/04/14	09:03	Day Team	No	N/A		No	Other	Patient too agitated	No	No Documented Reason		N/A	N/A	N/A	N/A	No	No	No	No	No	No	No	No	Yes	After one week	N/A
83	*	65	Male	24/04/14	19:22	On Call	Yes	No		Yes	N/A		N/A	N/A		N/A	N/A	Yes	Yes	Yes	Yes	Yes	Yes	Yes	Yes	Yes	Yes	Yes	24hours	N/A
84	*	33	Male	25/04/14	02:20	On Call	Yes	Yes	Picked up irregular HR - for ECG	Yes	N/A		N/A	N/A		N/A	N/A	No	N/A	Yes	Yes	No	Yes	Yes	Yes	Yes	Yes	No	Not taken	Patient Refused
85	*	28	Female	25/04/14	16:22	Day Team	Yes	No		Yes	N/A		N/A	N/A		N/A	N/A	Yes	Yes	Yes	Yes	Yes	Yes	Yes	Yes	Yes	Yes	Yes	24hours	N/A
86	*	25	Female	25/04/14	01:55	On Call	Yes	No		Yes	N/A		N/A	N/A		N/A	N/A	No	N/A	No	No	Yes	Yes	Yes	Yes	No	No	No	Not taken	Recent in-hospital bloods
87	*	69	Female	25/04/14	01:23	On Call	No	N/A		Yes	N/A		N/A	N/A		N/A	No	No	N/A	No	No	No	Yes	Yes	Yes	Partial	Partial	No	Not taken	No Documented Reason
88	*	20	Female	26/04/14	03:55	On Call	No	N/A		Yes	N/A		N/A	N/A		N/A	N/A	No	N/A	No	No	No	Yes	Yes	Yes	Partial	Partial	No	Not taken	No Documented Reason
89	*	64	Female	26/04/14	04:21	On Call	No	N/A		Yes	N/A		N/A	N/A		N/A	N/A	No	N/A	No	No	No	Yes	Yes	Yes	No	No	Yes	After one week	N/A
90	*	24	Male	26/04/14	09:31	Day Team	No	N/A		Yes	N/A		N/A	N/A		N/A	N/A	No	N/A	Yes	No	Yes	Yes	Yes	Yes	Yes	Yes	Yes	48hours	N/A
91	*	37	Female	26/04/14	23:20	On Call	No	N/A		Yes	N/A		N/A	N/A		N/A	N/A	No	N/A	No	Yes	Yes	Yes	Yes	Yes	Partial	Partial	Yes	48hours	N/A
92	*	26	Male	27/04/14	04:50	On Call	Yes	No		Yes	N/A		N/A	N/A		N/A	N/A	No	N/A	Yes	Yes	Yes	Yes	Yes	Yes	No	No	No	Not taken	No Documented Reason
93	*	76	Female	28/04/14	05:51	On Call	No	N/A		Yes	N/A		N/A	N/A		N/A	No	No	N/A	No	No	No	Yes	Yes	Yes	Partial	Partial	No	Not taken	Recent in-hospital bloods
94	*	46	Female	15/05/14	21:06	On Call	No	N/A		No	Patient Refused		No	No Documented Reason		No	N/A	No	N/A	No	No	No	No	No	No	No	No	No	Not taken	Recent in-hospital bloods
95	*	46	Male	16/05/14	01:35	On Call	No	N/A		No	Patient Refused		No	No Documented Reason		No	N/A	No	N/A	No	No	No	No	No	No	No	No	No	Not taken	No Documented Reason
96	*	51	Male	16/05/14	06:58	On Call	No	N/A		No	Other	Patient due to be transferred to other hospital	No	Other	patient transferred	N/A	N/A	No	N/A	No	No	No	No	No	No	No	No	No	Not taken	Other	Transferred to another hospital
97	*	36	Male	16/05/14	16:18	Day Team	No	N/A		Yes	N/A		N/A	N/A		N/A	N/A	No	N/A	No	Yes	No	Yes	Yes	Yes	Yes	Yes	Yes	24hours	N/A
98	*	44	Female	16/05/14	23:33	On Call	No	N/A		Yes	N/A		N/A	N/A		N/A	N/A	No	N/A	No	No	No	Yes	Yes	Yes	Yes	Partial	No	Not taken	No Documented Reason
99	*	43	Female	17/05/14	21:24	On Call	Yes	No		Yes	N/A		N/A	N/A		N/A	N/A	No	N/A	Yes	Yes	No	Yes	Yes	Yes	Yes	Yes	Yes	72hours	N/A
100	*	25	Male	18/05/14	00:52	On Call	No	N/A		Yes	N/A		N/A	N/A		N/A	N/A	No	N/A	Yes	Yes	Yes	Yes	Yes	Yes	Partial	Partial	Yes	48hours	N/A

## Sheet: Results Summary
	Results Summary:
		Pre-PIPHAS	Post-PIPHAS	Post-PIPHAS
				With PIPHAS Form	Without PIPHAS Form
	Patients, n	111	100	28	72
	Male, n	64	50	13	37
	Male, %	0.576577	0.5	0.464286	0.513889
	Age, mean	48.4	43.3	38.2	45.3
	Age, SD	22.3	18.6	19.4	18
	Oncall, n	91	84	25	59
	Oncall, %	0.81982	0.84	0.892857	0.819444
	Day Team, n	20	16	3	13
	Day Team, %	0.18018	0.16	0.107143	0.180556
	Physical Examination on admission?, n	78	75	28	47
	Physical Examination on admission?, %	0.702703	0.75	1	0.652778
	Physical Examination within 48hours?, n	7	7	0	7
	Physical Examination within 48hours?, %	0.212121	0.28	0	0.28
	Patients not examined, n	26	18	0	18
	Patients not examined, %	0.234234	0.18	0	0.25
	Total number examined:	85	82	28	54
	Female & >65years, n	19	10	3	7
	Offered breast exam, n	0	0	0	0
	Offered breast exam, %	0	0	0	0
	Chaperone used, n	15	11	9	2
	Chaperone used, %	0.176471	0.134146	0.321429	0.037037
	Chaperone same sex, n	10	11	9	2
	Chaperone same sex, %	0.666667	1	1	1
	Examination Domains:
	Consciousness full, n	34	25	19	6
	Consciousness full, %	0.4	0.304878	0.678571	0.111111
	Consciousness partial, n	7	1	0	1
	Consciousness partial, %	0.0823529	0.0121951	0	0.0185185
	Temperature, n	46	50	25	25
	Temperature, %	0.541176	0.609756	0.892857	0.462963
	BMI full, n	32	41	20	21
	BMI full, %	0.376471	0.5	0.714286	0.388889
	BMI partial, n	19	1	0	1
	BMI partial, %	0.223529	0.0121951	0	0.0185185
	CVS full, n	71	76	28	48
	CVS full, %	0.835294	0.926829	1	0.888889
	CVS partial, n	12	3	0	3
	CVS partial, %	0.141176	0.0365854	0	0.0555556
	Respiratory full, n	70	78	28	50
	Respiratory full, %	0.823529	0.95122	1	0.925926
	Respiratory partial, n	12	1	0	1
	Respiratory partial, %	0.141176	0.0121951	0	0.0185185
	Abdominal full, n	66	75	28	47
	Abdominal full, %	0.776471	0.914634	1	0.87037
	Abdominal partial, n	8	2	0	2
	Abdominal partial, %	0.0941176	0.0243902	0	0.037037
	PNS full, n	56	37	19	18
	PNS full, %	0.658824	0.45122	0.678571	0.333333
	PNS partial, n	14	22	2	20
	PNS partial, %	0.164706	0.268293	0.0714286	0.37037
	CNS full, n	51	37	19	18
	CNS full, %	0.6	0.45122	0.678571	0.333333
	CNS partial, n	7	21	2	19
	CNS partial, %	0.0823529	0.256098	0.0714286	0.351852
	Bloods taken, n	90	46	13	33
	Bloods taken, %	0.810811	0.46	0.464286	0.458333
